# Supplementary material
Source: publisher figshare collection journal article supplement (https://frontiersin.figshare.com/ndownloader/files/28574790)
Supplement: Supplementary file 1 [file 28574790]

**Appendix S3**

**Household survey**

Below is the household survey that participants completed. The survey is split into 3 sections

1. Uses of orchids,
2. Collecting of wild orchids,
3. Trading of orchids.

The survey was read aloud by the research assistant, and answers were entered into a tablet. The data was then stored on the tablet, and then uploaded to a server.

Participants had to read or listen to the participant information and click “yes” to the first question to indicate they understood the information and were happy to participate in the study. In the digital version of the survey, the order of questions is determined by the answers given. For example, if a participant stated that they did not use any non-farmed plants, then the digital survey would not ask them which plants they used as the question would be redundant. However, in this document every possible question is listed for clarity.

**Participant Information**

This survey is part of a project focused on understanding how people use natural plants in Vietnam being carried out by Imperial College London, the University of Oxford, Fauna and Flora International and the Center for Plant Conservation.

If you take part, it will take a maximum of 15 minutes and you will not have to give your name or any identifying information. No recordings or photographs will be taken and all answers are entered directly into the tablet, where they will be encrypted and stored securely.

You must be 18 years or over to participate in this study. You are under no obligation to participate, but I would appreciate your help with my research by completing this survey. Participation is voluntary and anonymous, and once you have begun the survey there is no obligation to continue. You are free to withdraw at any point without giving a reason and without any negative consequences. All data obtained from you prior to your withdrawal will be destroyed.

You will be given a unique ID number which you can use to contact me after completing the survey if you choose to no longer be a part of the study. I will only use the ID number to locate your data and remove it from the study if you so wish. You are free to ask questions at any point of the survey.

The overall results of this study may be published, but no respondents will be identiﬁed and there will be no chance that your answers can ever be linked back to you. The data may be shared with project partners, used in future studies and be transferred to, stored or processed at a destination outside your country.

This project has been reviewed and received ethics clearance through Imperial College London Research Ethics Committee. If you have any questions or concerns about any aspect of this project, please speak to the researcher who will do their best to answer your query, or please contact [project supervisor contact details] with reference LAVIETNAM.

Please indicate on the tablet that you have read and understand this information and agree to take part in the survey.

**I have read and understood the participant information and agree to participate in the study**

Yes

No

**In the last 12 months, has anybody in your household used any non-farmed plants for any the following reasons:**

*Please select all that apply*

Food

Medicine

To Sell

To decorate the house

To build with

For Fuel

No one has used any plants

Other

**Please specify the other use:**

**Thinking of the non-farmed plants used in the last 12 months, which plants were used?**

*Please select all that apply*

Fruits and vegetables

Wood/Timber

Orchids

Herbs

Other

**Please specify the other non-farmed plants used:**

**How did you get the non-farmed plants?**

*Please select all that apply*

I collected them from the forest

Someone else collected them from the forest for me

I bought them from a market

Someone else bought them for me from a market

Other

**Please specify the other way you got the non-farmed plants:**

**In the last 12 months, have you gone into the mountains to collect plants?**

Yes

No

**In the last 12 months, how many times on average have you gone into the mountains to collect plants?**

*(eg. every day, every week, every month etc.)*

**In the last 12 months, have you collected orchids from the mountain?**

Yes

No

**Over the last 12 months, on average, how many individual orchid plants would you collect on each trip?**

**Please describe what you did after collecting the orchids – Please describe what you did after collecting the orchids**

**"After collecting the orchids, I…"**

**The researcher is now going to show you pictures of plants. Please list the numbers of the plants you have collected in the last 12 months:**

*Please select all that apply*

**In the last 12 months, have you bought any orchids for any purpose?**

Yes

No

**In the last 12 months, on average, how often have you bought orchids?**

*(eg. every day, every week, every month etc.)*

**When buying orchids in the last 12 months, on average, how many individual orchids would you buy each time you bought them?**

**Please describe how you used the orchids you bought**

**"After buying the orchids, I…"**

**In the last 12 months, where did you buy orchids?**

*Please select all that apply*

At a local market

At the side of the road

On the internet eg. social media, auction websites etc.

Other

**Please specify the other place you bought the orchids:**

**The researcher is now going to show you pictures of plants. Please list the numbers of the plants you have bought in the last 12 months:**

*Please select all that apply*

**In the last 12 months, have you bought orchids to sell to other people?**

Yes

No

**In the last 12 months, where have you bought orchids before selling them to someone else?**

*Please select all that apply*

A local market

On the side of the road

Over the internet eg social media, auction websites etc.

Other

**Please specify the other place you bought orchids before selling them to someone else:**

**Please describe what happened when you sold the orchids on**

**"After I bought the orchids, I…"**

**Please tell me about when you sell orchids:**

*For example, do you sell them at a certain time of year, whenever you ﬁnd them, just when you need to etc.*

**Please tell me what you know about when other people sell orchids:**

*For example, do they sell them at a certain time of year, whenever they ﬁnd them, just when they need to etc.*

**What is your year of birth?**

**What is your current employment status?**

Employed full time

Employed part time

Housewife/Househusband

Student

Unemployed

Retired

Self-employed

Other

**Please specify your employment status**

**If employed, what is your profession?**

**What professional area do you work in?**

**What is your highest level of education?**

*Please select one*

No School

Primary School

Secondary School

Bachelors degree

Masters degree

PhD

**That concludes the survey. Many thanks for taking part.**

**None of the answers can be tracked back to you. If you choose to withdraw from the project, or you have any questions please contact Leigh-Anne at leigh-anne.bullough17@imperial.ac.uk using your ID number as a reference.**

**Thank you for your time. Please hand the tablet back to the research assistant.**

**The following questions are to be answered by the researcher.**

**Which province does the respondent live in?**

**Estimate respondents’ gender:**

Female

Male

Other

**Estimate age if not stated:**

<18

18-24

25-34

35-44

45-54

55-64

65-74

75-85

>85

**ID Number:**

**Survey Number:**

**Did you read the survey or did the respondent complete it themselves?**

I read the survey

The respondent completed the survey

Both

**Survey Feedback**
